# Supplementary material for: Coffee intake and risk of diabetic nephropathy: a Mendelian randomization study
Source: PubMed Central journal article supplement (PMC10352828; doi:10.3389/fendo.2023.1169933), 2023-07-04
Supplement: Image_1.pdf [file Image_1.pdf]

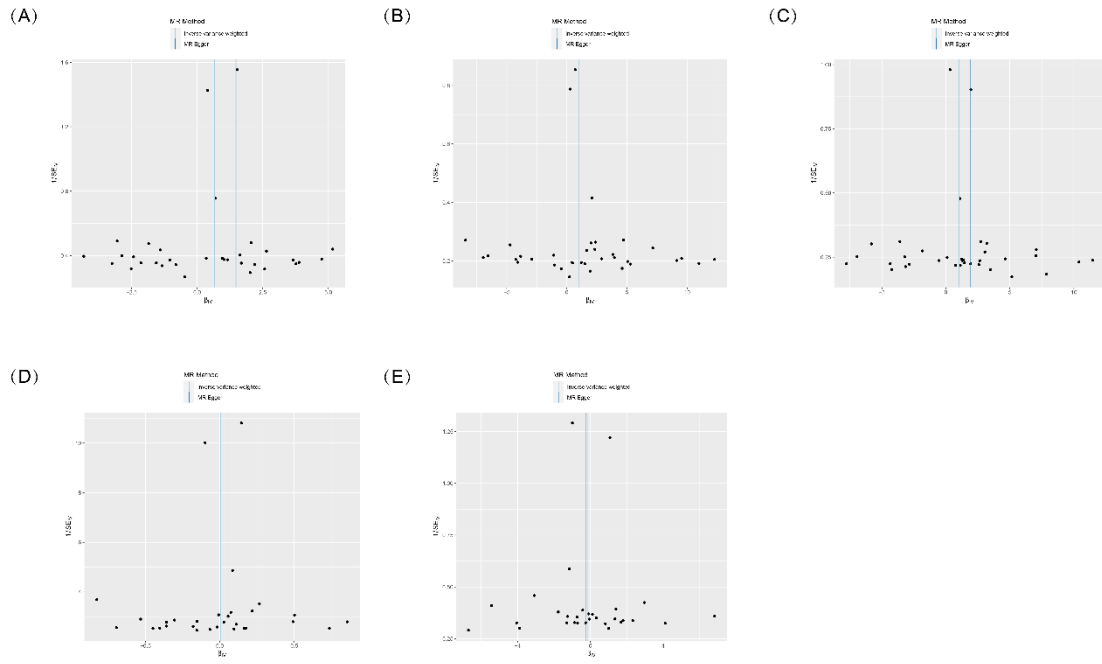

**Supplementary Figure 1.** Funnel plot showing heterogeneity on coffee intake and Diabetic nephropathy(A), type 1 diabetes with renal complications(B), type2 diabetes with renal complications(C), glomerular filtration rate in diabetics (D), urinary albumin-to-creatinine ratio(E)
